# Supplementary material for: Low-Molecular-Weight Fucoidan as Complementary Therapy of Fluoropyrimidine-Based Chemotherapy in Colorectal Cancer
Source: MDPI journal article supplement (doi:10.3390/ijms22158041), 2021-07-27
Supplement: s1 [file s1]

S1A

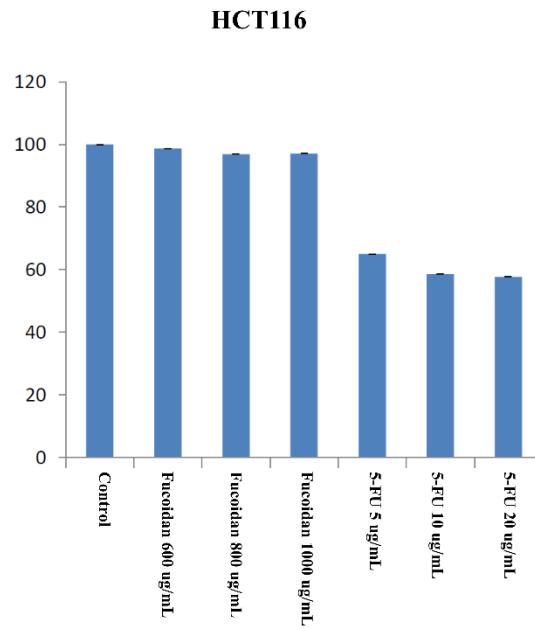

S1B

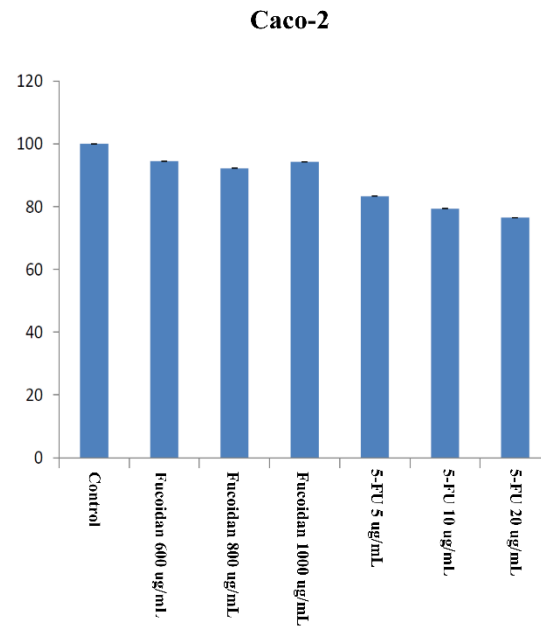

**Figure S1.** Effects of LMWF and 5-fluorouracil (5-FU) on viability after treatment with LMWF (three different doses: 600, 800, and 1000  $\mu\text{g/mL}$ ) and 5-FU (three different doses: 5, 10, and 20  $\mu\text{g/mL}$ ). (A) HCT116 cells. (B) Caco2 cells.
